# Supplementary material
Source: PubMed Central journal article supplement (PMC5560087)
Supplement: NIHMS890812-supplement-Supp_TableS1.pdf [file NIHMS890812-supplement-Supp_TableS1.pdf]

**Table S1.** Animal MHC haplotypes, vaccination and SIV challenge outcome.

| ID           | MHC haplotype |              | Vaccination <sup>a</sup><br>group | SIV challenge <sup>b</sup><br>outcome |
|--------------|---------------|--------------|-----------------------------------|---------------------------------------|
|              | MHC I         | MHC II       |                                   |                                       |
| AM271        | M3/M5         | M3/M4        | Control                           | Infected                              |
| BM280        | M3/M3         | M3/M3        | Control                           | Infected                              |
| AT45         | M1/recM1M3    | M1/M3        | Control                           | Infected                              |
| BM805        | M1/M4         | M2/M4        | Control                           | Infected                              |
| <b>BM796</b> | <b>M3/M4</b>  | <b>M3/M4</b> | Control                           | Infected                              |
| <b>BM843</b> | <b>M3/M4</b>  | <b>M3/M4</b> | Control                           | Uninfected                            |
| AM260        | M1/M4         | M1/M4        | Vaccine                           | Infected                              |
| AM672        | M1/M6         | M1/M6        | Vaccine                           | Infected                              |
| AT789        | M1/M3         | M1/M3        | Vaccine                           | Infected                              |
| AV429        | M1/M2         | M1/M2        | Vaccine                           | Infected                              |
| BM524        | M2/M6         | M2/M6        | Vaccine                           | Infected                              |
| BM576        | M1/M3         | M1/M5        | Vaccine                           | Infected                              |
| <b>BM795</b> | <b>M3/M4</b>  | <b>M3/M4</b> | Vaccine                           | Infected                              |
| AV187        | M7/M4         | recM7M3/M4   | Vaccine                           | Uninfected                            |

a. Monkeys received either control vector or a vaccine targeting SIV protease cleavage sites.

b. Uninfected monkeys (without detectable viral load after SIV challenge) were excluded from study.
